# Supplementary material for: Sub-60 mV per decade switching in ion-gel-gated In–Sn–O transistors with a nano-thick charge trapping layer
Source: Royal Society of Chemistry journal article supplement (doi:10.1039/c9nr06641a), 2019-01-01
Supplement: c9nr06641a1.pdf [file c9nr06641a1.pdf]

## **Sub-60 mV/decade switching in ion-gel-gated In-Sn-O transistors with a nano-thick charge trapping layer**

Wanrong Liu,<sup>1</sup> Jia Sun<sup>1\*</sup>, Weijie Qiu,<sup>1</sup> Yang Chen,<sup>1</sup> Yulong Huang,<sup>1</sup> Juxiang Wang,<sup>1</sup> and Junliang Yang<sup>1\*</sup>

<sup>1</sup>Hunan Key Laboratory for Super Microstructure and Ultrafast Process, School of Physics and Electronics, Central South University, Changsha, Hunan 410083, P. R. China

Corresponding Author: [jiasun@csu.edu.cn](mailto:jiasun@csu.edu.cn) (J. Sun); [junliang.yang@csu.edu.cn](mailto:junliang.yang@csu.edu.cn) (J. Yang)

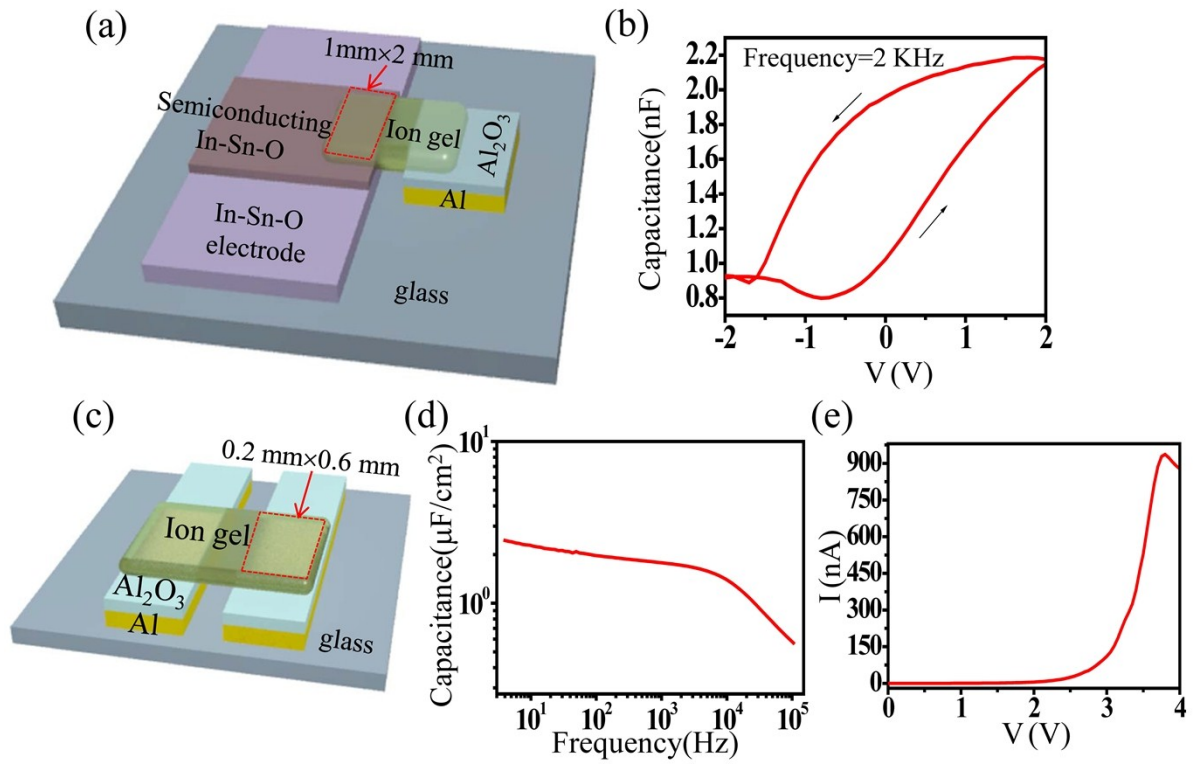

**Figure S1.** The dielectric properties of the stacking layer of naturally oxidized Al<sub>2</sub>O<sub>3</sub> and an ion gel. (a) A schematic image of device structure for C-V measurement. The semiconducting In-Sn-O was prepared by using RF sputtering with a Ar/O<sub>2</sub> flow rate of 46 sccm / 4 sccm. (b) The C-V curve of the stacking dielectric. (c) A schematic image of device structure for C-F and breakdown measurements. (d) The C-F curve of the stacking dielectric. (e) The I-V curve of the stacking dielectric.

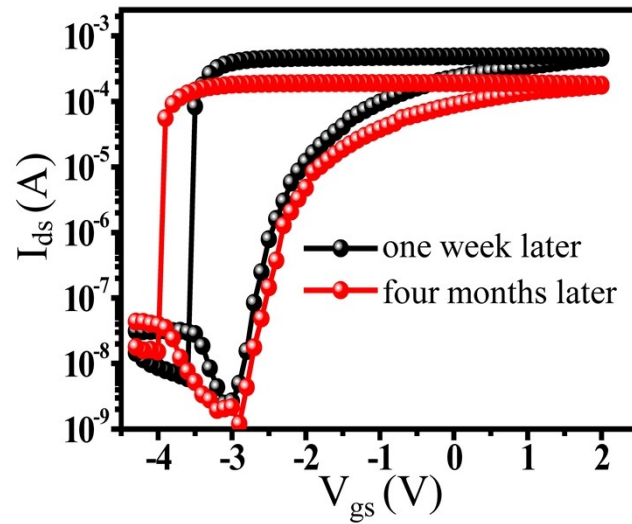

**Figure S2.** The transfer characteristics of Al gate device was measured when the device was placed in air for 1 week and 4 months, respectively.

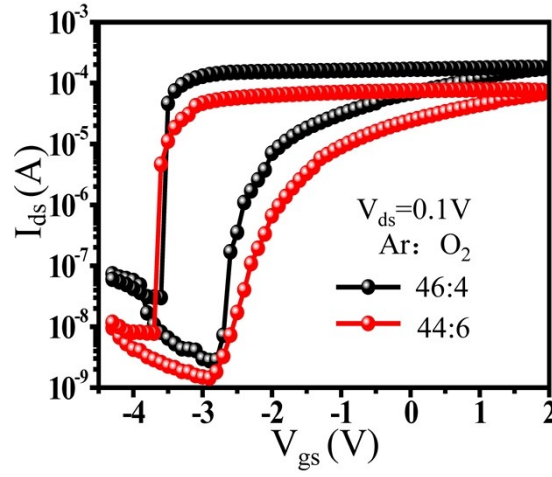

**Figure S3.** Transfer characteristics curves of In-Sn-O FETs by changing the Ar/O<sub>2</sub> flow rate and a  $V_{ds}$  is fixed at 0.1 V

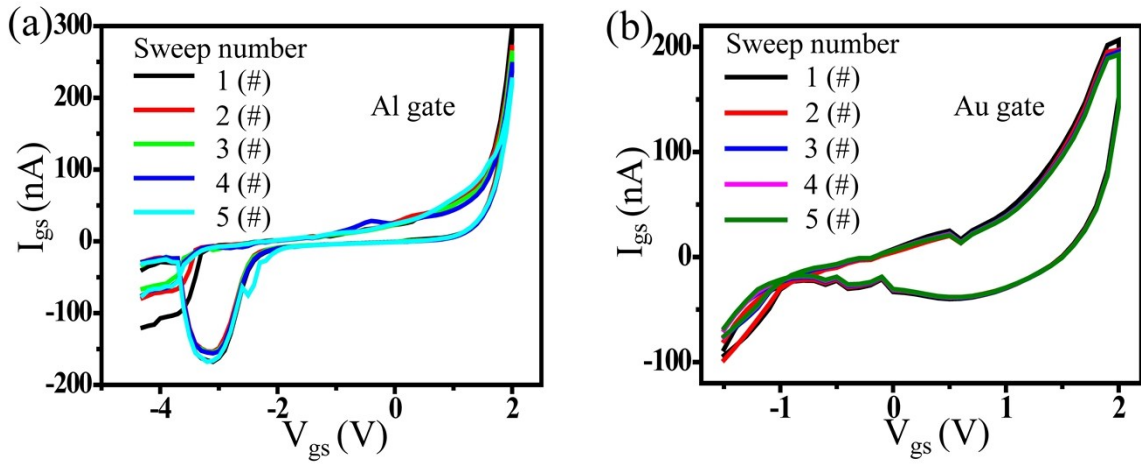

**Figure S4.** (a) The corresponding  $I_{gs}$  curves of the devices with an Al gate electrode. (b) The corresponding  $I_{gs}$  curves of the devices with a Au gate electrode.

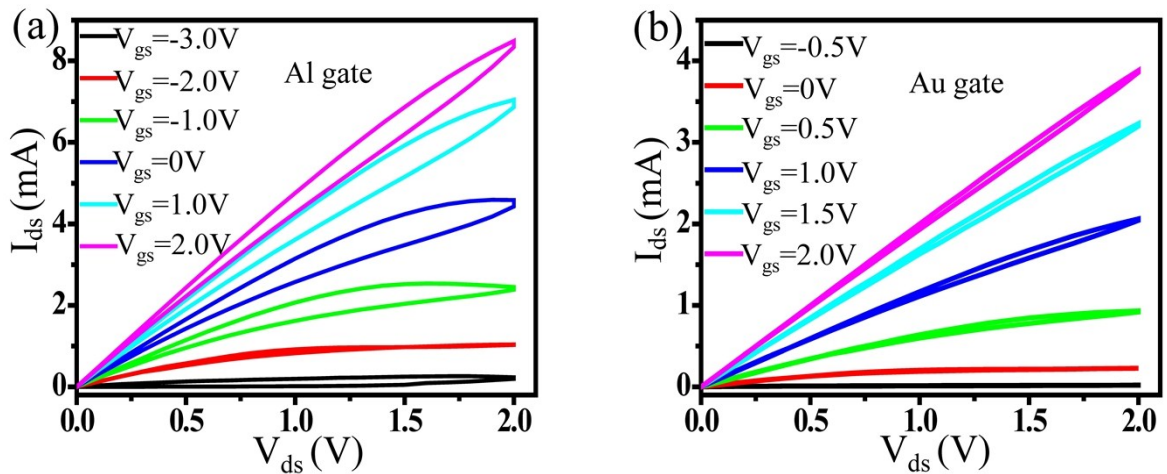

**Figure S5.** (a) The dual sweep output curve of FET with an Al gate electrode. (b) The dual sweep output curve of FET with a Au gate electrode.

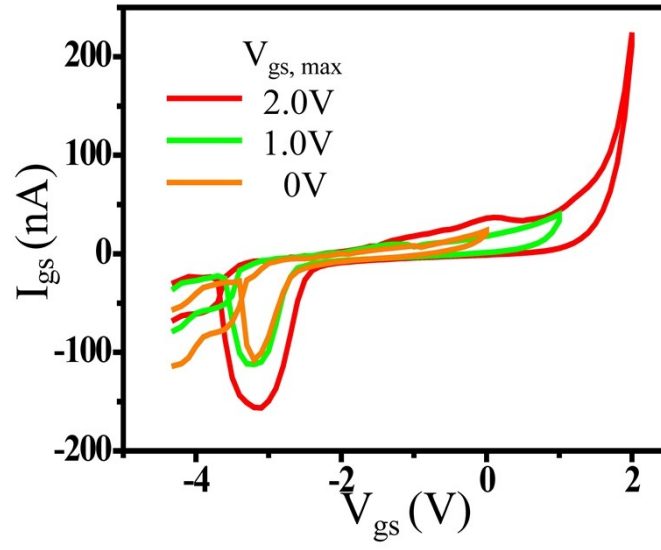

**Figure S6.** The corresponding  $I_{gs}$  curves by changing the maximum gate-source voltage  $V_{gs, \max}$ .

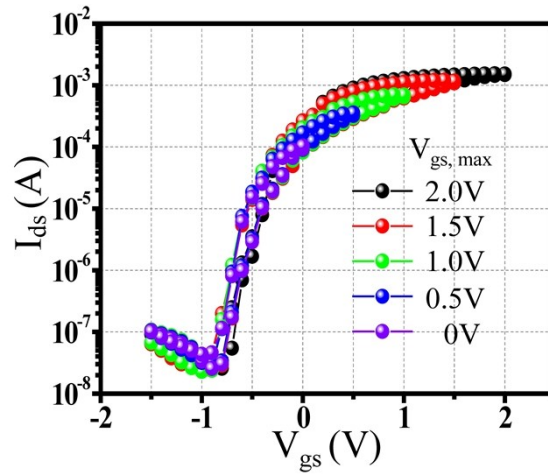

**Figure S7.** Transfer characteristic curves for different maximum gate-source voltages  $V_{gs, \max}$  of Au gate electrode device.

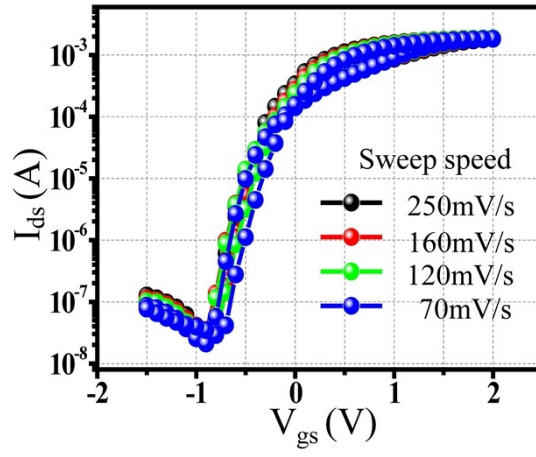

**Figure S8.** Transfer characteristic curves for different sweep speed of Au gate electrode device.

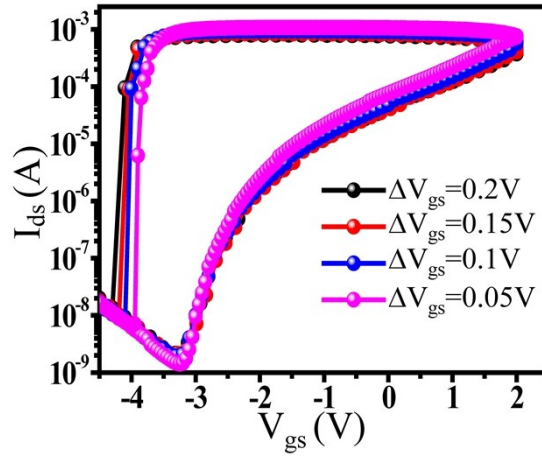

**Figure S9.** Transfer characteristic curves of the devices with an Al gate electrode for different  $V_{gs}$  scan intervals.
